# Supplementary material
Source: PubMed Central journal article supplement (PMC7295487)
Supplement: mmc1.pdf [file mmc1.pdf]

# THE LANCET Infectious Diseases

## Supplementary webappendix

This webappendix formed part of the original submission and has been peer reviewed. We post it as supplied by the authors.

This online publication has been corrected. The corrected version first appeared at [thelancet.com](http://thelancet.com) on June 25, 2020.

Supplement to: Cox RJ, Brokstad KA, Krammer F, Langeland N, for the Bergen COVID-19 Research Group. Seroconversion in household members of COVID-19 outpatients. *Lancet Infect Dis* 2020; published online June 15. [https://doi.org/10.1016/S1473-3099\(20\)30466-7](https://doi.org/10.1016/S1473-3099(20)30466-7).

## **Appendix**

Bergen COVID-19 Research Group: Bjørn Blomberg, Kanika Kuwelker, Sarah Lartey, Dagrund Waag Linchausen, Kristin GI Mohn, Camilla Tøndel, Francisco Gomez Real, Juha Vahokoski, Amit Bansal, Geir Bredholt, Anders Madsen, Therese Bredholt Onyango, Mai Chi Trieu, Fan Zhou, Marianne Sævik
